# Supplementary material for: Universality of indeterminate growth in lizards rejected: the micro-CT reveals contrasting timing of growth cartilage persistence in iguanas, agamas, and chameleons
Source: Springer Nature journal article supplement (doi:10.1038/s41598-019-54573-5), 2019-12-12

**Universality of indeterminate growth in lizards rejected: the micro-CT reveals contrasting timing of growth cartilage persistence in iguanas, agamas, and chameleons**

Petra Frýdlová<sup>1,3</sup>, Jana Mrzálková<sup>2,3</sup>, Martin Šeremeta<sup>2,3</sup>, Jan Křemen<sup>2,3</sup>, Jan Dudák<sup>2,4</sup>, Jan Žemlička<sup>2,4</sup>, Pavel Němec<sup>1</sup>, Petr Velenský<sup>5</sup>, Jiří Moravec<sup>6</sup>, Daniel Kolečka<sup>7</sup>, Veronika Zahradníčková<sup>1</sup>, Tomáš Jirásek<sup>8</sup>, Petr Kodým<sup>9</sup>, Daniel Frynta<sup>1\*</sup>, Petr Zach<sup>2,3</sup>

**SI 1. Visualization of growth plate cartilage (GPC) degradation by micro-CT.** Frontal cross-section of the proximal part of the femur in adult old *Calumma parsonii*. The epiphyseal growth plate is in the process of gradual degradation. Abbreviations: Epiphysis (Epi), Metaphysis (Met), Diaphysis (Dia), Suture (Sut), Epiphyseal growth plate (asterisk). Note the incomplete suture in the metaphyseal region and partly resorbed GPC. Bar 20  $\mu\text{m}$ .

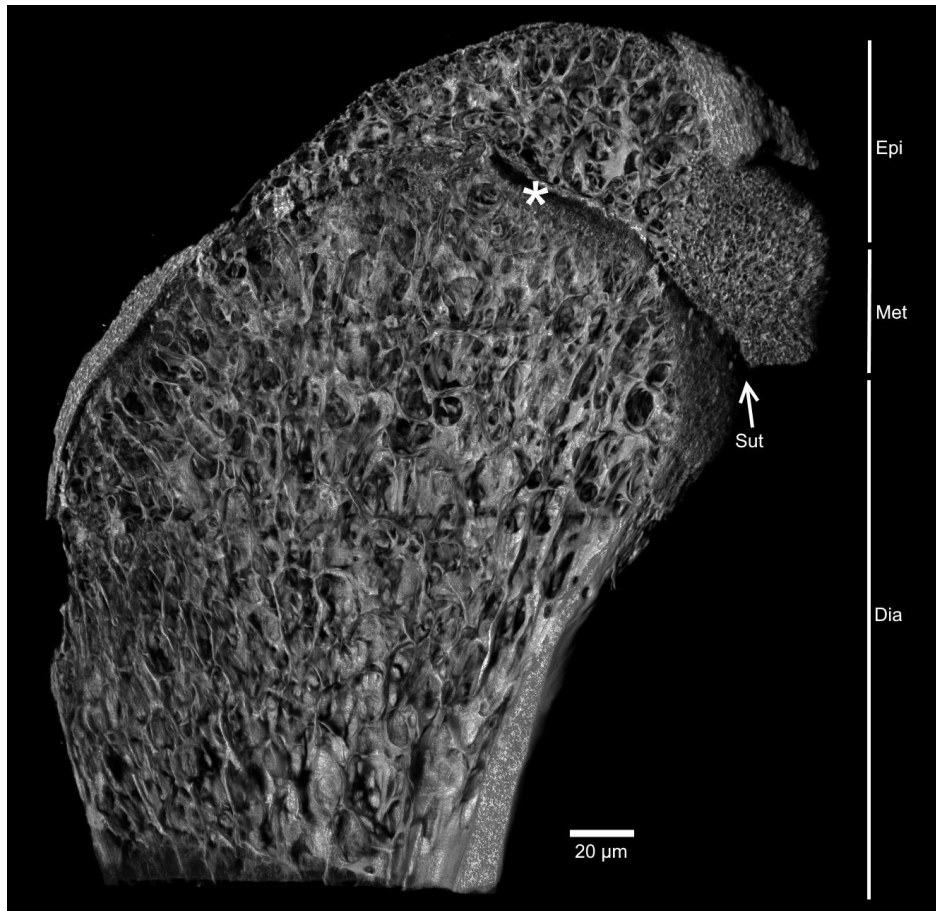

Supplement: 41598_2019_54573_MOESM1_ESM.pdf [file 41598_2019_54573_MOESM1_ESM.pdf]
